# Supplementary material for: Proteomic Profiling of Colon Cancer Tissues: Discovery of New Candidate Biomarkers
Source: MDPI journal article supplement (doi:10.3390/ijms21093096), 2020-04-28
Supplement: s1 [file s1]

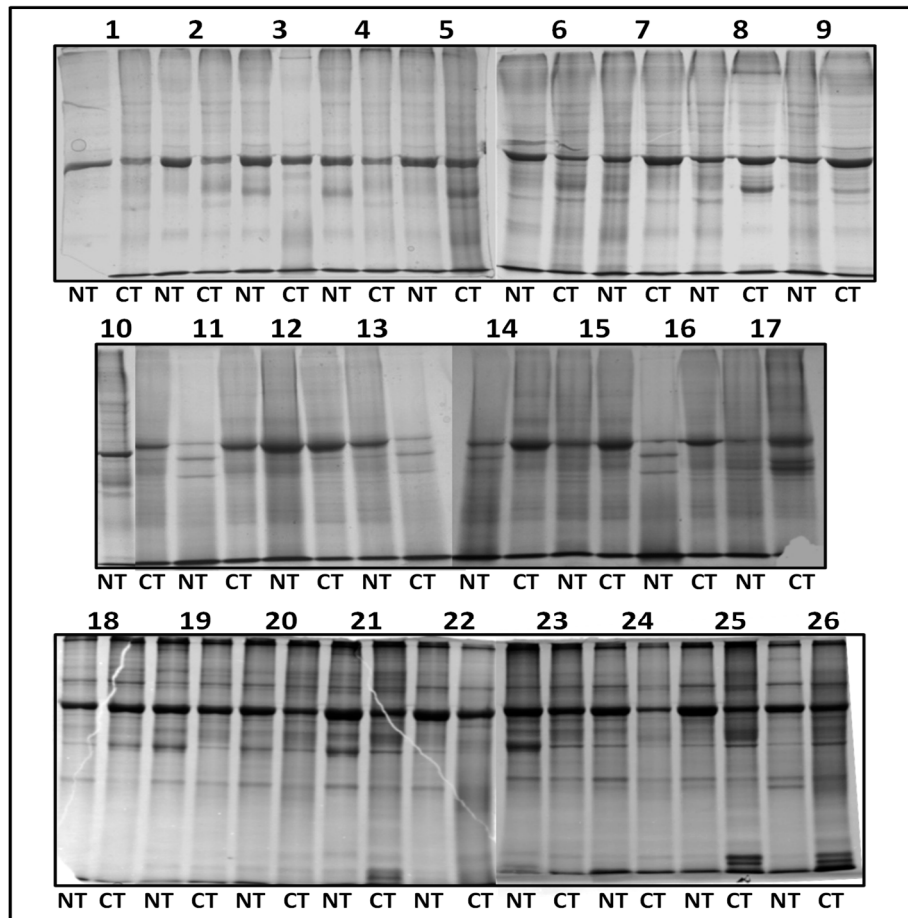

**Supplementary Figure 1:** SDS-PAGE (Sodium dodecyl sulfate –polyacrilamide-gel electrophoresis) of total protein extracts from 26 colon cancer tissues (CT) and paired normal tissues (NT) after staining with Blue Coomassie.

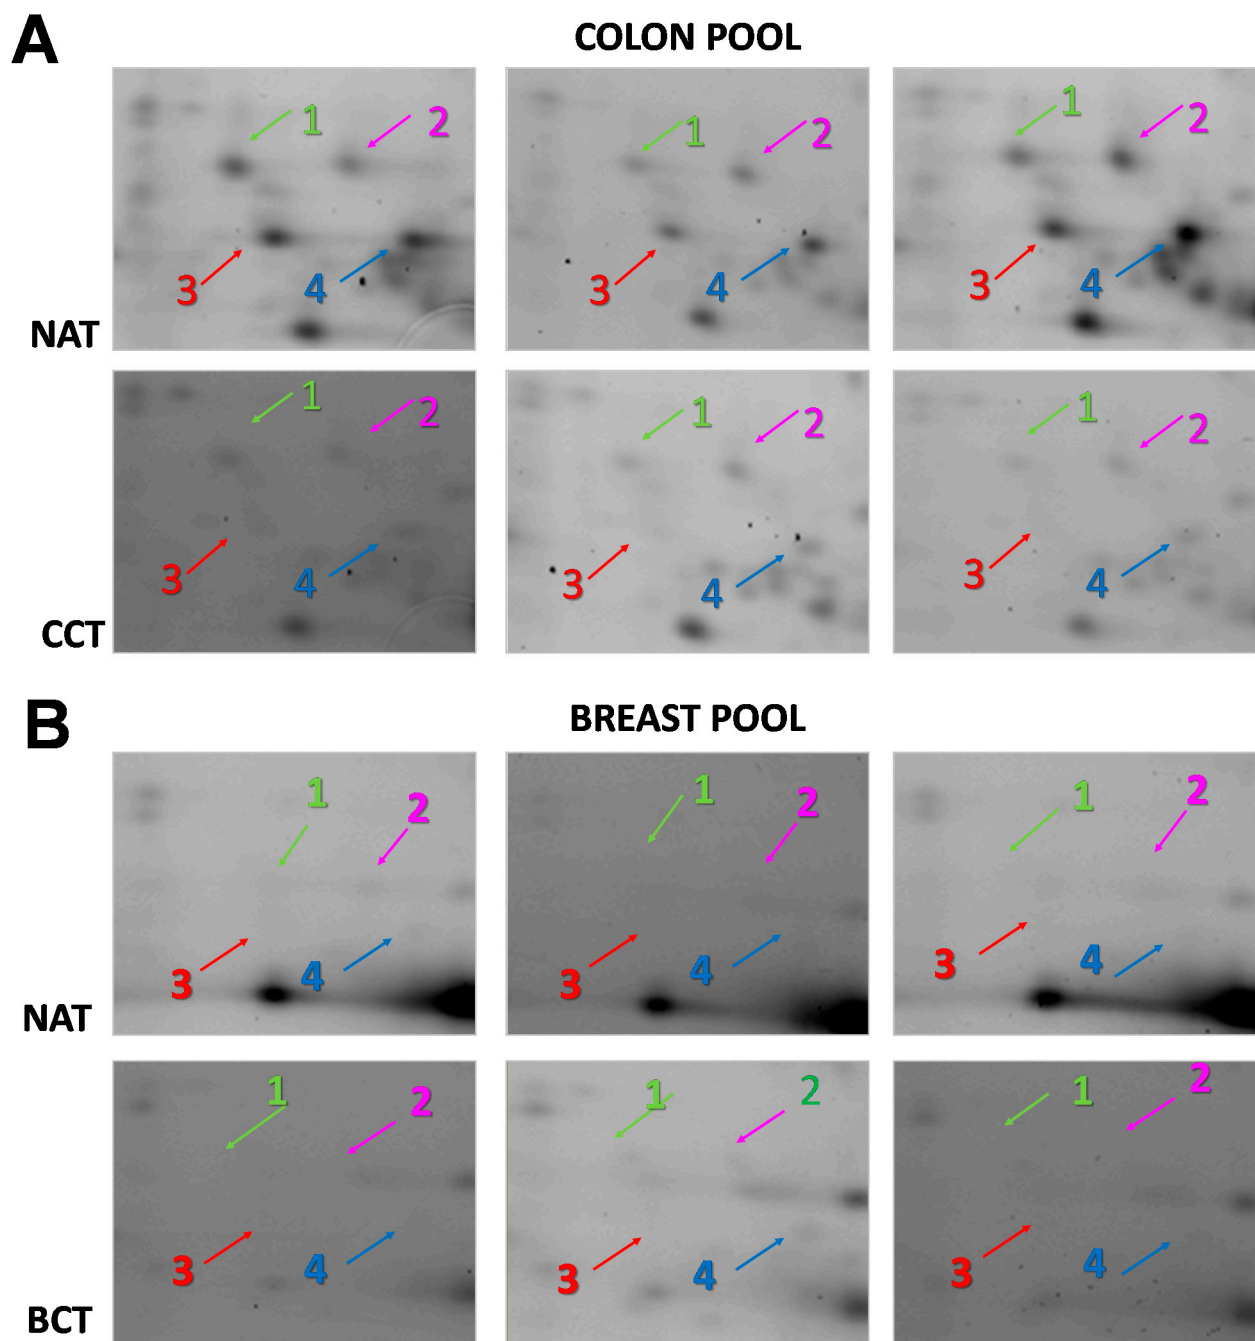

**Supplementary Figure 2:** Details of proteomic maps (2D-DIGE) of colon **A**) and breast **B**) pools (both cancer and normal adjacent tissues) showing the different TAGL identified protein species.

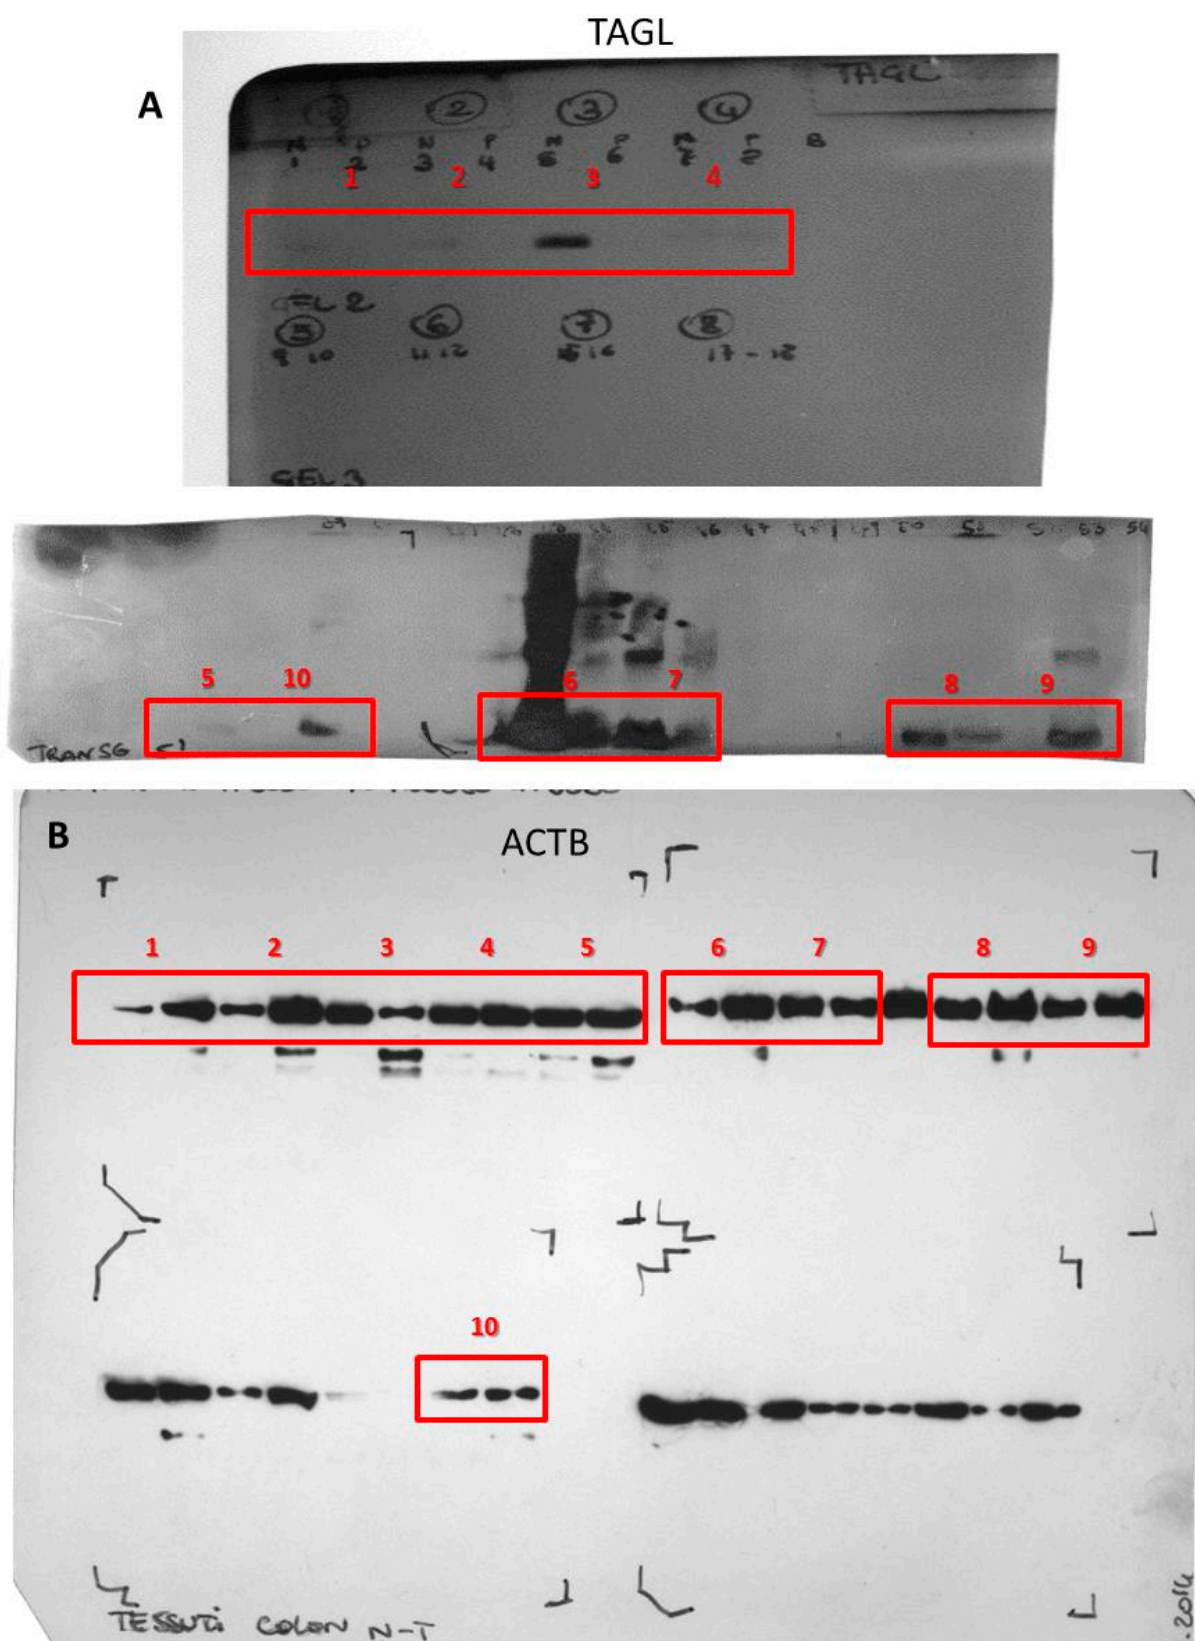

Supplementary Figure 3: Original western blots of TAGL **A**) and ACTB **B**).
